# Supplementary material for: The use of Oxford Nanopore native barcoding for complete genome assembly
Source: PubMed Central journal article supplement (PMC5467021; doi:10.1093/gigascience/gix001), 2017-02-24

# 1 The use of Oxford Nanopore native barcoding for complete genome assembly.

1 2 Sion C. Bayliss<sup>ax</sup>, Vicky L. Hunt<sup>a</sup>, Maho Yokoyama<sup>a</sup>, Harry A. Thorpe<sup>a</sup> and Edward J. Feil<sup>a</sup>

3 3 <sup>a</sup>The Milner Centre for Evolution, Department of Biology and Biochemistry, University of Bath,  
4 Claverton Down, Bath BA2 7AY, UK

7 5 \* For correspondence: [s.bayliss@bath.ac.uk](mailto:s.bayliss@bath.ac.uk). Tel: +44 (0)1225 340959

## 11 7 **Abstract**

## 14 8 **Background**

15 9 The Oxford Nanopore Technologies MinION(TM) is a mobile DNA sequencer that can produce long  
17 10 read sequences with a short turn-around time. Here we report the first demonstration of single  
18 contig genome assembly using Oxford Nanopore native barcoding when applied to a multiplexed  
19 11 library of 12 samples and combined with existing Illumina short-read data. This paves the way for  
20 12 the closure of multiple bacterial genomes from a single MinION(TM) sequencing run, given the  
22 13 availability of existing short-read data. The strain we used, MHO\_001, represents the important  
24 14 community-acquired methicillin resistant *Staphylococcus aureus* lineage USA300.

## 27 16 **Findings**

29 17 Using a hybrid assembly of existing short read and barcoded long read sequences from  
30 18 multiplexed data, we completed a genome of the *S. aureus* USA300 strain MHO\_001. The long-  
32 19 read data represented only ~5-10% of an average MinION(TM) run (~7x genomic coverage), but,  
34 20 using standard tools, this was sufficient to complete the circular chromosome of *S. aureus* strain  
35 21 MHO\_001 (2.86 Mb) and two complete plasmids (27 Kb and 3 Kb). Minor differences were noted  
36 22 when compared to USA300 reference genome, USA300\_FPR3757, including the translocation,  
37 23 loss and gain of mobile genetic elements.

## 41 24 **Conclusion**

43 25 Here we demonstrate that MinION(TM) reads, multiplexed using native barcoding, can be used in  
44 26 combination with short-read data, to fully complete a bacterial genome. The ability to complete  
46 27 multiple genomes, for which short-read data is already available, from a single MinION(TM) run is  
48 28 set to impact on our understanding of accessory genome content, plasmid diversity and genome  
49 29 rearrangements.

## 54 31 **Keywords**

56 32 Whole genome sequencing, *Staphylococcus aureus*, MinION, long read, hybrid assembly, bacterial  
58 33 genomics, multiplexing, native barcoding.

## 34 **Data description**

1 35 The spread of methicillin resistant *Staphylococcus aureus* (MRSA) represents a significant burden  
2 36 in both the health-care setting and the community. The USA300 clone is a particular cause for  
3  
4 37 concern, being responsible for an increasing number of skin and soft-tissue infections within the  
5  
6 38 community, particularly in North America [1]. The advent of new sequencing technologies is set to  
7  
8 39 inform on novel intervention and surveillance strategies, although important technical limitations  
9  
10 40 remain. Whilst short read data provides an excellent means to assay the variation within the core  
11  
12 41 genome, which is useful for reconstructing hospital outbreaks, it is usually not possible to infer  
13  
14 42 genome re-arrangements or to fully assemble mobile genetic elements (MGEs) such as plasmids  
15  
16 43 from these data. Closure of bacterial genomes has been demonstrated on *Escherichia coli* using  
17  
18 44 the Oxford Nanopore Technologies (ONT) MinION(TM) reads alone and on a range of bacteria  
19  
20 45 including *Bacteriodes fragilis*, *Acinetobacter baylyi* and *Francisella* spp. using a hybrid approach  
21  
22 46 combining error prone long reads with low error rate short reads [2–5]. Here we demonstrate that it  
23  
24 47 is also possible to generate complete genomes using multiplexed reads from a single MinION(TM)  
25  
26 48 run in combination with matched Illumina short reads. We used a strain of *S. aureus* of the  
27  
28 49 USA300 lineage as an example.

26  
27 50

## 28 29 51 **Methods**

30  
31 52

### 32 53 **MinION(TM) library construction and sequencing**

33

34 54 *S. aureus* strain MHO\_001 was recovered in 2015 from asymptomatic nasal carriage via a  
35  
36 55 standard nasal swab of a healthy individual with informed consent. DNA from an overnight culture  
37  
38 56 was extracted using the Qiagen Genomic Tip 500/G Kit, following the manufacturer's instructions,  
39  
40 57 except lysozyme was replaced with lysostaphin to a final concentration of 200 µg/ml. Sequencing  
41  
42 58 library preparation was carried out with Nanopore Genomic Sequencing Kit SQK-MAP006 (Oxford  
43  
44 59 Nanopore Technologies, UK) and a PCR free 'native barcoding' kit provided by ONT. The NEBNext  
45  
46 60 Ultra II End Repair/dA Tailing kit (E7546S, NEB, USA) was used to prepare 1000 ng of sheared  
47  
48 61 genomic DNA (1000 ng DNA in 50 µl nuclease free water, 7 µl of Ultra II End-Prep Buffer, 3 µl Ultra  
49  
50 62 II End-Prep Enzyme Mix in a total volume of 60 µl). The reaction was incubated for 5 minutes at  
51  
52 63 20°C and heat inactivated for 5 minutes at 65°C. The DNA was purified using a 1:1 volume of  
53  
54 64 Agencourt AMPure XP beads (A63880, Beckman Coulter, USA) according to manufacturer's  
55  
56 65 instructions and eluted in 31 µl of nuclease free water. Blunt/TA Ligase Master Mix (M0367S, NEB,  
57  
58 66 USA) was used to ligate native barcode adapters to 22.5 µl of 500ng end prepared DNA for 10  
59  
60 67 minutes at room temperature. The barcoded DNA was purified using a 1:1 volume of AMPure XP  
61  
62 68 beads and eluted in 26 µl nuclease free water. Twelve barcoded samples from diverse sources

59  
60

61 2 of 12

62  
63

64  
65

69 including other bacterial samples were pooled, 58 ng of each sample was added to give 700 ng of  
70 pooled library DNA. Hairpin adapters were ligated using 10 µl Native Barcoding Adapter Mix, 50 µl  
1  
271 Blunt/TA Ligase Master Mix and 2 µl Native Barcoding Hairpin Adapter (BHP) added to 38 µl the  
3  
472 pooled library DNA to give a final reaction volume of 100 µl. The reaction mixture was incubated for  
5  
573 10 minutes at room temperature before the addition of 1 µl of HP tether and a further 10 min  
6  
774 incubation. The final reaction was cleaned using pre-washed Dynabeads MyOne Streptavidin C1  
8  
975 beads (65001; Thermo Fisher Scientific, USA). DNA concentrations at each step were measured  
10  
1076 using a Qubit Fluorometer. 6 µl of the pooled, barcoded library was mixed with 65 µl nuclease free  
11  
1277 water, 75 µl 2x Running Buffer and 4 µl Fuel Mix (SQK-MAP006, Oxford Nanopore Technologies,  
13  
1478 UK) and immediately loaded onto a MinION(TM) Flow Cell Mk I R7.3 on a MinION(TM) MkI  
15  
1579 controlled by MinKNOW version 0.50.2.15 software (Oxford Nanopore Technologies, UK). Base  
16  
1780 calling was performed using Metrichor ONT Sequencing Workflow Software v1.19.0 with the  
18  
1981 Basecall\_Barcoding workflow (Oxford Nanopore Technologies, UK). The additional DNA samples  
20  
2082 included in the pooled library were a diverse assemblage of bacterial and eukaryotic DNA samples  
21  
2283 provided by attendees during the PoreCamp Workshop 2015 at the University of Birmingham. The  
23  
2484 additional pooled library samples are being prepared for separate publication. Details on the  
25  
2585 PoreCamp Workshop and associated publications can be found at <http://porecamp.github.io/>.  
26  
2786 MinION reads were deposited in the European Nucleotide Archive under study accession  
28  
2987 PRJEB14152.

30  
3188

### 32 89 **Illumina library construction and sequencing**

3490 An overnight culture was grown on TSB agar from a 15% glycerol stock maintained at -80 °C. An  
35  
3691 aliquot of the culture was added to tubes containing DNA beads and library preparation was carried  
37  
3892 out by MicrobesNG, University of Birmingham (<http://microbesng.uk>). A single 250 bp paired end  
39  
3993 library was constructed and sequenced on both MiSeq and HiSeq Illumina platforms. The reads  
40  
4194 from both sequencing runs were combined before downstream analysis. The sequenced strain is  
42  
4395 stored in the MicrobesNG indexed repository as strain 2998-174. Reads were deposited in the  
44  
4496 European Nucleotide Archive under study accession PRJEB14152.

45  
4697

### 47 98 **Assembly, Annotation and Analysis**

49  
5099 The full informatics analysis and associated data is available as a step-by-step walk-through at  
51  
52100 [https://github.com/SionBayliss/MHO\\_analysis](https://github.com/SionBayliss/MHO_analysis). Illumina reads were trimmed using Trimmomatic-  
53  
53101 0.33 [6]. Reads were trimmed to a minimum read quality of Q15. Reads below 30 bp in length were  
54  
54102 excluded and sequencing adapters were removed. MinION(TM) 2D reads were filtered into pass  
55  
55103 and fail reads by the Metrichore basecaller, hereafter these two categories of reads will be referred  
56  
57104 to as “2D pass” and “2D fail” reads, following the terminology adopted by the manufacturer and  
58  
59

60  
61  
62 3 of 12  
63  
64  
65

105 used in Karlsson et al. and Ip et al. [4,7]. These are equivalent to the “high quality” and “low quality”  
106 read groups from Oikonomopoulos et al. [8]. MinION(TM) 1D reads were not used for this analysis.  
107 The 2D fail reads, those which did not pass the basecaller quality threshold, were demultiplexed  
108 using an in-house script (FilterBarcodes.pl). The twelve 40 bp barcodes used for library  
109 construction were compared in a moving 40 bp window to the sequence in the first and last 150 bp  
110 of each read. The barcode requiring the least insertions, deletions or substitutions to be permuted  
111 into a sequence in the beginning or end of a read, with a maximum cut-off of 14 permutations, was  
112 considered a match. Each read could only be assigned to one individual sample, in the case of a  
113 tie the reads were discarded. Sequence preceding or following the presence of a barcode at the  
114 beginning or end of a read, respectively, were trimmed as adapter sequence. After quality  
115 trimming, 439,480 paired short reads, 1324 2D pass reads and 1499 demultiplexed 2D fail reads  
116 (2823 total) nanopore long reads were passed as input files to SPAdes v3.6.1 using the  
117 --nanopore, --cov-cutoff 5 and --careful options [9]. The nanopore reads had a median read length  
118 of 7,577 bp, a maximum length of 23,380 bp and a minimum length of 250 bp (Figure 1A). After  
119 assembly, all contigs less than 300 bp were removed. This resulted in three contigs, the complete  
120 chromosome of MHO\_001, and two complete plasmids. The contigs were circularised by MUSCLE  
121 v3.8.31 alignment (default parameters) of identical overlapping regions at the end of contigs and  
122 removal of one alternative overlapping sequence using an in-house script  
123 (CirculariseOnOverlaps.pl) [10]. Start sites were fixed relative to the beginning of the relevant  
124 reference sequence. A BLAST search against the nt/nr database using default megablast settings  
125 revealed the closest, well studied, reference genome was USA300\_FPR3757  
126 (Genbank:CP000255) [11]. The two smaller contigs were 100% identical in both aligned sequence  
127 and alignment length to previously sequenced *S. aureus* lineage USA300 plasmids, SAP046A  
128 (Genbank:GQ900404.1) and SAP046B (Genbank:GQ900403.1). The smallest plasmid was also  
129 identical to USA300\_FPR3757 plasmid pUSA01 (CP000256). The complete genome of MHO\_001  
130 was annotated using Prokka 1.11 [12].

131 In order to calculate per base read coverage short and long reads were mapped to MHO\_001  
132 using BWA 0.7.12-r1039 and coverage was calculated using samtools 1.2 [13,14]. Nanopore reads  
133 were mapped using the 'bwa mem -x ont2d' option. In order to assess the sequence similarity and  
134 number of reads mapped between the long reads and the MHO\_001 assembly the nanopore 2D  
135 pass, demultiplexed 2D fail reads and 2D fail reads in which no barcodes were identified were  
136 aligned to the MHO\_001, including plasmids, using BLASR (Figure 1, Table 1) [15]. SNPs were  
137 called between the chromosome and reference genome using MAUVE [16]. SNPs were further  
138 confirmed by mapping short reads independently to USA300\_FPR3757 and calling variants.  
139 Mapping was performed using BWA, reads at indel sites were realigned using the GATK toolbox  
140 and SNPs were called using samtools [14,17]. The variant call file (VCF) was filtered for variants

141 supported by a minimum read depth of 4 (minimum 2 per strand), >30 map quality, >50 average  
142 base quality, no significant strand bias and >75% of reads supporting the variant. Indels were  
143 additionally confirmed using pindel [18]. The VCF file was filtered to remove regions unique to  
144 MHO\_001 or USA300\_FPR3757. Repeat regions of >50bp, which are notoriously problematic for  
145 short read mapping, were identified using nucmer and removed from the comparison [19]  
146 [Supplementary Table 1]. The absence of SAPI5 in MHO\_001 and expansion of the tRNA island at  
147 554,826 were confirmed using PCR and Sanger sequencing (Supplementary Analysis).

10  
1148

## 1149 **Results and Discussion**

150 A hybrid assembly using a low coverage of MinION(TM) reads (6-8x) combined with moderate  
151 coverage Illumina reads (~50x) was used to generate a complete genome. The assembly resolved  
152 regions of the genome that were problematic for short read assembly alone, such as chromosomal  
153 rRNA operons. The generation of a complete genome from only ~5% of the possible current yield  
154 of a MinION(TM) run using a multiplexed library should represent a cost effective means to  
155 complete multiple genomes during a single MinION(TM) sequencing run, although the approach  
156 also requires matching short-read Illumina data. Larger or more complex bacterial genomes may  
157 require higher coverage read data alongside additional bioinformatics analyses to generate  
158 comparably polished, complete genomes [3].

159 By demultiplexing the 2D fail reads we were able to double the number of nanopore reads for  
160 assembly from 1324 to 2823 reads. The nanopore reads were aligned to the complete MHO\_001  
161 genome using BLASR (Figure 1, Table 1). 1320/1324 (99.70%) 2D pass reads demultiplexed by  
162 Metrichor aligned to the assembly with an average percentage similarity of 85.87% and a mean  
163 alignment length of 96.79% of the input read. 1292/1499 (99.70%) 2D fail reads demultiplexed by  
164 in-house scripts aligned to the assembly with an average percentage similarity of 77.76% and a  
165 mean alignment length of 92.90%. The fail reads in which we failed to find a barcode contained  
166 722/9501 (7.60%) reads that aligned to the MHO\_001 genome. In summary, a considerable  
167 amount of useful information was contained within the demultiplexed 2D fail reads without which  
168 we would have been unable to produce a complete genome. We can conclude that we were able  
169 to correctly identify the ONT barcodes in ~85% of the 2D fail reads used for assembly.

170 The chromosome showed minor differences to the USA300 reference genome USA300\_FPR3757  
171 including 155 SNP differences and the loss and gain of mobile genetic elements (Figure 2). In  
172 order to provide an independent confirmation of the 155 SNP differences identified by MAUVE  
173 between aligned regions of MHO\_001 and USA300\_FPR3757 the short reads were mapped to  
174 USA300\_FPR3757 and variants were called using strict parameters. Of the 155 MAUVE SNPs 41  
175 (26.5%) were present in repeat regions and excluded from the comparison. Of the remaining 114

176 SNPs, 111 (97.36%) were supported by short read mapping to USA300\_FPR3757. The remaining  
177 3 SNPs (2.6%) were unsupported. No indels were identified by short read mapping to MHO\_001  
178 by either GATK/samtools or pindel. In summary, of the 114 SNPs identified by MAUVE that could  
179 be robustly investigated by short read mapping 111 (97.4 %) were confirmed using low error rate  
180 short reads. Furthermore, the long and short read coverage support at the edge of each of the  
181 large structural variants in MHO\_001 was 8-10x for nanopore reads, with the exception of the 3'  
182 edge of the transposed 13,356 bp insertion sequence (IS) which had a read coverage of 3x,  
183 compared to the genomic average of 6.8x coverage. The edge of each structural variant was  
184 supported by >25 short reads.

185 There was minor sequence dissimilarity, including a small deletion, in ribosomal RNA operons. This  
186 could either reflect evolutionary changes in these highly conserved sequences or minor  
187 misassembly; these regions are typically difficult to assemble. MHO\_001 lacked Staphylococcal  
188 pathogenicity island 5 (SAPI5), a 13,960 bp exotoxin encoding transposon observed at position  
189 881,852 in the reference. MHO\_001 also lacked the prophage phiSA3USA which harbours the  
190 important virulence factor staphylokinase. As the integration site of this phage (the *h/b* gene) is  
191 intact it is possible that MHO\_001 has never acquired this phage. MHO\_001 contained a 42,297  
192 bp tyrosine recombinase bacteriophage integrated at position 867,385. This bacteriophage  
193 contained a beta-lactamase and a putative Panton-Valentine-like leucocidin and several  
194 hypothetical genes. The position of an insertion sequence containing *ftsK* translocase differs  
195 between MHO\_001 and the reference genome, consistent with a translocation event  
196 (USA300\_FPR3757:1630720-1644076 to MHO\_001:679522-692877). The location of this element  
197 in MHO\_001 truncates a gene of unknown function. There is a short 1282 bp deletion of a gene  
198 encoding an exotoxin at position 448,767 in MHO\_001. MHO\_001 also has an extended tRNA  
199 cluster at 554,826 containing 7 additional tRNAs (val, thr, lys, gly, leu, arg, pro) relative to  
200 USA300\_FPR3757, representing either gene expansion, or reduction of this gene cluster in  
201 USA300\_FPR3757.

202 A BLAST search revealed that the two smaller contigs were identical to previously sequenced  
203 plasmids associated with USA300 [20]. The larger of the plasmids contained an N-type replication  
204 system (*repA*) with a pSK1 type plasmid partitioning system. It encoded a host of resistance  
205 genotypes including macrolide (*mac*), erythromycin (*ery*), cadmium (*cadX* and *cadD*), streptothricin  
206 (*sta*), aminoglycoside (*aad*), neomycin and kanamycin (*aph*) resistance genes. In addition to this  
207 the plasmid contained a Tn552-like transposon containing a beta-lactam resistance (*bin*, *blaI*,  
208 *blaR1*, *blaZ*) operon and a *sin* recombinase. The smaller of the two plasmids encoded three  
209 hypothetical proteins and a replicase. Both plasmids have been previously observed to occur  
210 concurrently in the same host.

211 There was a discrepancy observed between the coverage of short and long reads of plasmidic and  
212 of 12

212 chromosomal contigs (Figure 2, top and middle panels). The average chromosomal coverage was  
213 49.6x (7.0 SD) with short read data and 6.8x (2.6 SD) with nanopore reads. The average short  
214 read coverage of plasmids A and B was 78.35 (8.9 SD) and 7302.04 (85.4 SD) respectively. This  
215 represents a coverage increase of 1.5- and 150-fold relative to the chromosome. The opposite  
216 trend was observed with long reads; plasmids A and B had an average coverage of 4.05 (2.0 SD)  
217 and 2.9 (1.7 SD) respectively, which represents a 40% and 60% decrease in coverage relative of  
218 the chromosome. In addition to this the smaller of the two plasmids was only intermittently covered  
219 by nanopore reads. The reduced number of mappable nanopore reads was likely due to the  
220 fragment size selection steps during library preparation. The inherent problems of aligning long  
221 error-prone reads to reference sequences may also have contributed. It is thus important that  
222 future studies attempting to reconstruct plasmids or studying plasmid diversity consider the impact  
223 of size selection on downstream analysis or to prepare multiple DNA libraries with differential size  
224 selection as previously discussed by Koren and Phillippy [21]. However, the clear benefit of hybrid  
225 sequencing is that it allows for the generation of larger assemblies with less uncertainties than by  
226 using a single sequencing technology preferentially over another.

## 227 228 **Competing interests**

229 No competing interests.

## 230 231 **Funding**

232 The authors would like to acknowledge BBSRC/NERC grant number BB/M026388/1 for providing  
233 funding for SB. SB and VH were also funded by a grant from the United Kingdom Clinical  
234 Research Collaboration (UKCRC) Translational Infection Research (TIR) initiative, and the Medical  
235 Research Council (Grant Number G1000803, held by Prof. Sharon Peacock) with contributions  
236 from the Biotechnology and Biological Sciences Research Council, the National Institute for Health  
237 Research on behalf of the Department of Health, and the Chief Scientist Office of the Scottish  
238 Government Health Directorate. The authors are grateful for travel funds provided by NERC  
239 (NE/N000501/1) for SB and Medical Research Council Cloud Infrastructure for Microbial  
240 Bioinformatics (CLIMB) for VH to attend.

## 241 242 **Authors Contributions**

243 SB and VH were responsible for the conception and design of study and data acquisition. SB  
244 performed the analysis and interpretation of data and manuscript drafting. MY carried out the  
245 supplementary analysis. HAT and EF revised the manuscript critically for important intellectual



246 content. SB and EF approved the version of the manuscript to be published.

247

2

## 248 **Acknowledgements**

4

249 The authors would like to acknowledge the contribution of Nick Loman and the rest of the  
250 organizing committee of the PoreCamp 2015 nanopore training workshop which was hosted in the  
251 Centre for Computational Biology at the University of Birmingham during December 2015. We  
252 would like to thank Oxford Nanopore Technologies for allowing the University of Bath access to the  
253 MinION(TM) Access Programme (MAP).

13

14

15

## 255 **Data Availability**

16

256 The dataset supporting the conclusions of this article is available in the European Nucleotide  
257 Archive repository under project number PRJEB14152. Further supporting data is also available  
258 from the *GigaScience* GigaDB repository [22].

23

24

25

## 260 **Availability and requirements**

26

261 • Project name: MHO\_001 hybrid read assembly and analysis

28

262 • Project home page: [https://github.com/SionBayliss/MHO\\_analysis](https://github.com/SionBayliss/MHO_analysis)

29

263 • Operating system: Unix

30

264 • Programming language: R, perl

31

265 • Other requirements: Dependencies include Samtools (>=1.18), Trimmomatic, SPAdes  
266 v3.6.1, BWA (0.7.5a-r405), BioPerl, MAUVE, BLASR, prokka, Tablet/Artemis

32

267 • License: GNU GPL v3

33

34

35

## 269 **References**

36

270 1. Glaser P, Martins-Simões P, Villain A, Barbier M, Tristan A, Bouchier C, et al. Demography and  
271 Intercontinental Spread of the USA300 Community-Acquired Methicillin-Resistant *Staphylococcus*  
272 *aureus* Lineage. MBio. 2016;7:e02183-15.

47

273 2. Loman NJ, Quick J, Simpson JT. A complete bacterial genome assembled de novo using only  
274 nanopore sequencing data. Nat. Methods. 2015;12:733–5.

48

275 3. Risse J, Thomson M, Patrick S, Blakely G, Koutsovoulos G, Blaxter M, et al. A single  
276 chromosome assembly of *Bacteroides fragilis* strain BE1 from Illumina and MinION nanopore

49

50

61 8 of 12

62

63

64

65



277 sequencing data. *Gigascience*. 2015;4:60.

278 4. Karlsson E, Lärkeryd A, Sjödin A, Forsman M, Stenberg P. Scaffolding of a bacterial genome  
279 using MinION nanopore sequencing. *Sci. Rep.* 2015;5:11996.

280 5. Madoui M-A, Engelen S, Cruaud C, Belser C, Bertrand L, Alberti A, et al. Genome assembly  
281 using Nanopore-guided long and error-free DNA reads. *BMC Genomics*. 2015;16:327.

282 6. Bolger AM, Lohse M, Usadel B. Trimmomatic: a flexible trimmer for Illumina sequence data.  
283 *Bioinformatics*. 2014;30:2114–20.

284 7. Ip CLC, Loose M, Tyson JR, de Cesare M, Brown BL, Jain M, et al. MinION Analysis and  
285 Reference Consortium: Phase 1 data release and analysis. *F1000Research*. 2015;4:1–35.

286 8. Oikonomopoulos S, Wang YC, Djambazian H, Badescu D, Ragoussis J. Benchmarking of the  
287 Oxford Nanopore MinION sequencing for quantitative and qualitative assessment of cDNA  
288 populations. *Sci. Rep.* 2016;6:31602.

289 9. Bankevich A, Nurk S, Antipov D, Gurevich AA, Dvorkin M, Kulikov AS, et al. SPAdes: a new  
290 genome assembly algorithm and its applications to single-cell sequencing. *J. Comput. Biol.*  
291 2012;19:455–77.

292 10. Edgar RC. MUSCLE: multiple sequence alignment with high accuracy and high throughput.  
293 *Nucleic Acids Res.* 2004;32:1792–7.

294 11. Diep BA, Gill SR, Chang RF, Phan TH, Chen JH, Davidson MG, et al. Complete genome  
295 sequence of USA300, an epidemic clone of community-acquired methicillin-resistant  
296 *Staphylococcus aureus*. *Lancet* . 2006;367:731–9.

297 12. Seemann T. Prokka: rapid prokaryotic genome annotation. *Bioinformatics*. 2014;30:2068–9.

298 13. Li H, Durbin R. Fast and accurate short read alignment with Burrows-Wheeler transform.  
299 *Bioinformatics*. 2009;25:1754–60.

300 14. Li H, Handsaker B, Wysoker A, Fennell T, Ruan J, Homer N, et al. The Sequence  
301 Alignment/Map format and SAMtools. *Bioinformatics*. 2009;25:2078–9.

302 15. Chaisson MJ, Tesler G, Smith T, Waterman M, Zhang Z, Schwartz S, et al. Mapping single  
303 molecule sequencing reads using basic local alignment with successive refinement (BLASR):  
304 application and theory. *BMC Bioinformatics*. 2012;13:238.

305 16. Darling AE, Mau B, Perna NT. progressiveMauve: multiple genome alignment with gene gain,  
306 loss and rearrangement. *PLoS One*. 2010;5:e11147.

307 17. McKenna A, Hanna M, Banks E, Sivachenko A, Cibulskis K, Kernytsky A, et al. The Genome  
308 Analysis Toolkit: a MapReduce framework for analyzing next-generation DNA sequencing data.

309 Genome Res. 2010;20:1297–303.

310 18. Ye K, Schulz MH, Long Q, Apweiler R, Ning Z. Pindel: a pattern growth approach to detect  
311 break points of large deletions and medium sized insertions from paired-end short reads.

312 Bioinformatics. 2009;25:2865–71.

313 19. Kurtz S, Phillippy A, Delcher AL, Smoot M, Shumway M, Antonescu C, et al. Versatile and open  
314 software for comparing large genomes. *Genome Biol.* 2004;5(2):R12

315 20. Shearer JES, Wireman J, Hostetler J, Forberger H, Borman J, Gill J, et al. Major families of  
316 multiresistant plasmids from geographically and epidemiologically diverse staphylococci. *G3.*

317 2011;1:581–91.

318 21. Koren S, Phillippy AM. One chromosome, one contig: complete microbial genomes from long-  
319 read sequencing and assembly. *Curr. Opin. Microbiol.* 2015;23:110–20.

320 22. Bayliss SC, Hunt VL, Yokoyama M, Thorpe HA, Feil EJ. Supporting data for "The use of Oxford  
321 Nanopore native barcoding for complete genome assembly". *GigaScience Database.* 2016.

322 <http://dx.doi.org/10.5524/100269>.

323

## 324 **Figure Legends**

325

326 Figure 1. Figure summarising read statistics for the 2D nanopore pass (red) and fail (green) reads.

327 A) Read length distributions of pass and fail reads. Data was binned every 500 bp. B) Box and

328 whisker plot of the sequence similarity of nanopore reads to the genome of MHO\_001 as

329 determined by BLASR. Only the alignment with the highest percentage similarity was considered

330 for each read. The lower and upper "hinges" correspond to the first and third quartiles. The upper

331 and lower whiskers extend from the hinge to the most extreme value that is within 1.5 x

332 interquartile range. Data beyond the end of the whiskers are outliers and plotted as points. C) The

333 distribution of BLASR alignment lengths of nanopore reads as a percentage of the original read

334 length. Only the alignment with the highest percentage similarity was considered for each read.

335 Nanopore 2D reads with a phred score greater than 8 were classified by Metrichor as pass reads

336 (blue), all other 2D reads were classified as fail reads (blue).

337

338 Table 1. Table summarising the BLASR analysis of demultiplexed 2D pass and fail nanopore long

339 reads assigned to sample MHO\_001. Reads were aligned to the assembled MHO\_001 reference

340 genome using BLASR with default parameters. Only the alignment with the highest percentage

341 similarity was considered for each read. The average alignment length was calculated from the

342 length of the top BLASR alignment relative to the length of the input read.

343

60  
61 of 12

63

64

65

344 Figure 2. Alignment of MHO\_001 chromosome (A), plasmid A (B) and plasmid B (C) to the  
345 USA300\_FPR3757 genome and reference plasmids alongside long and short read coverage. The  
346 bottom panels show alignments between MHO\_001 and the reference sequences. Contiguous  
347 sequences are shown by connecting red lines and inversions are depicted in blue. Coding  
348 sequences (CDS) are annotated as blue rectangles with the exception of ribosomal RNA operons  
349 which are represented by red rectangles. Those above the line represent open reading frames on  
350 the forward strand and those under the line on the reverse strand. Notable mobile genetic  
351 elements or genomic features are annotated. A scale bar in basepairs (bp) is presented  
352 underneath each contig. The middle panels represent per base read coverage of short reads  
353 across the MHO\_001 genome. The data was binned every 1000 bp. The y-axis, representing per  
354 bin read coverage, has been constrained to 200, 350 and 8000 reads per bin for the MHO\_001  
355 chromosome, plasmid A and plasmid B respectively. The top panel represents the per base read  
356 coverage of nanopore long reads across the MHO\_001 genome. The data was binned every 1000  
357 bp. The y-axis, representing per bin read coverage, has been constrained to 20 reads per bin for  
358 each contig.

359  
360 Supplementary Table 1. Table summarising the BLASR analysis of demultiplexed non-target  
361 sample 2D nanopore long reads and 2D fail reads in which no barcode was detected. Reads were  
362 aligned to the assembled MHO\_001 reference genome using BLASR with default parameters.  
363 Only the alignment with the highest percentage similarity was considered for each read. The  
364 average alignment length was calculated from the length of the top BLASR alignment relative to  
365 the length of the input read.

366  
367 Supplementary Table 2. Spreadsheet summarising the comparison between SNPs called by  
368 MAUVE alignment of assemblies created using long and short reads and SNPs called via mapping  
369 short reads to USA300\_FPR3757.

370  
371 Supplementary Figure 1. MAUVE alignment of the overlapping region included in the circularised  
372 single chromosomal contig aligned to USA300\_FPR3757.

373  
374 Supplementary Figure 2. MAUVE alignment of the overlapping region not included in the  
375 circularised single chromosomal contig aligned to USA300\_FPR3757.

376  
377 Supplementary Figure 3. CLUSTAL visualisation of the MUSCLE alignment between the two  
378 overlapping regions at the edge of the single chromosomal contig.

379  
380 Supplementary Figure 4. Tablet visualisation of the nanopore long reads that span the overlapping  
381 of 12

381 regions at the edge of the circularised single chromosomal contig.

382

1  
283 Supplementary Analysis. PCR and Sanger sequencing analysis of large structural variants SAPI5  
3  
484 and tRNA expansion.

5

6

7

8

9

10

11

12

13

14

15

16

17

18

19

20

21

22

23

24

25

26

27

28

29

30

31

32

33

34

35

36

37

38

39

40

41

42

43

44

45

46

47

48

49

50

51

52

53

54

55

56

57

58

59

60

61

62

63

64

65

|                                         | <b>Pass</b>   | <b>Fail</b>   |
|-----------------------------------------|---------------|---------------|
| <i># Reads</i>                          | 1324          | 1499          |
| <i># BLASR Hits (% # Reads)</i>         | 1320 (99.70%) | 1292 (86.19%) |
| <i>Mean Alignment Length (%)</i>        | 96.79         | 92.90         |
| <i>Mean Percentage Similarity (%)</i>   | 85.87         | 77.76         |
| <i># Hits &lt; 75% Read Length (%)</i>  | 11 (0.83%)    | 93 (7.20%)    |
| <i># Hits &gt;= 75% Read Length (%)</i> | 1309 (99.17%) | 1199 (92.80%) |

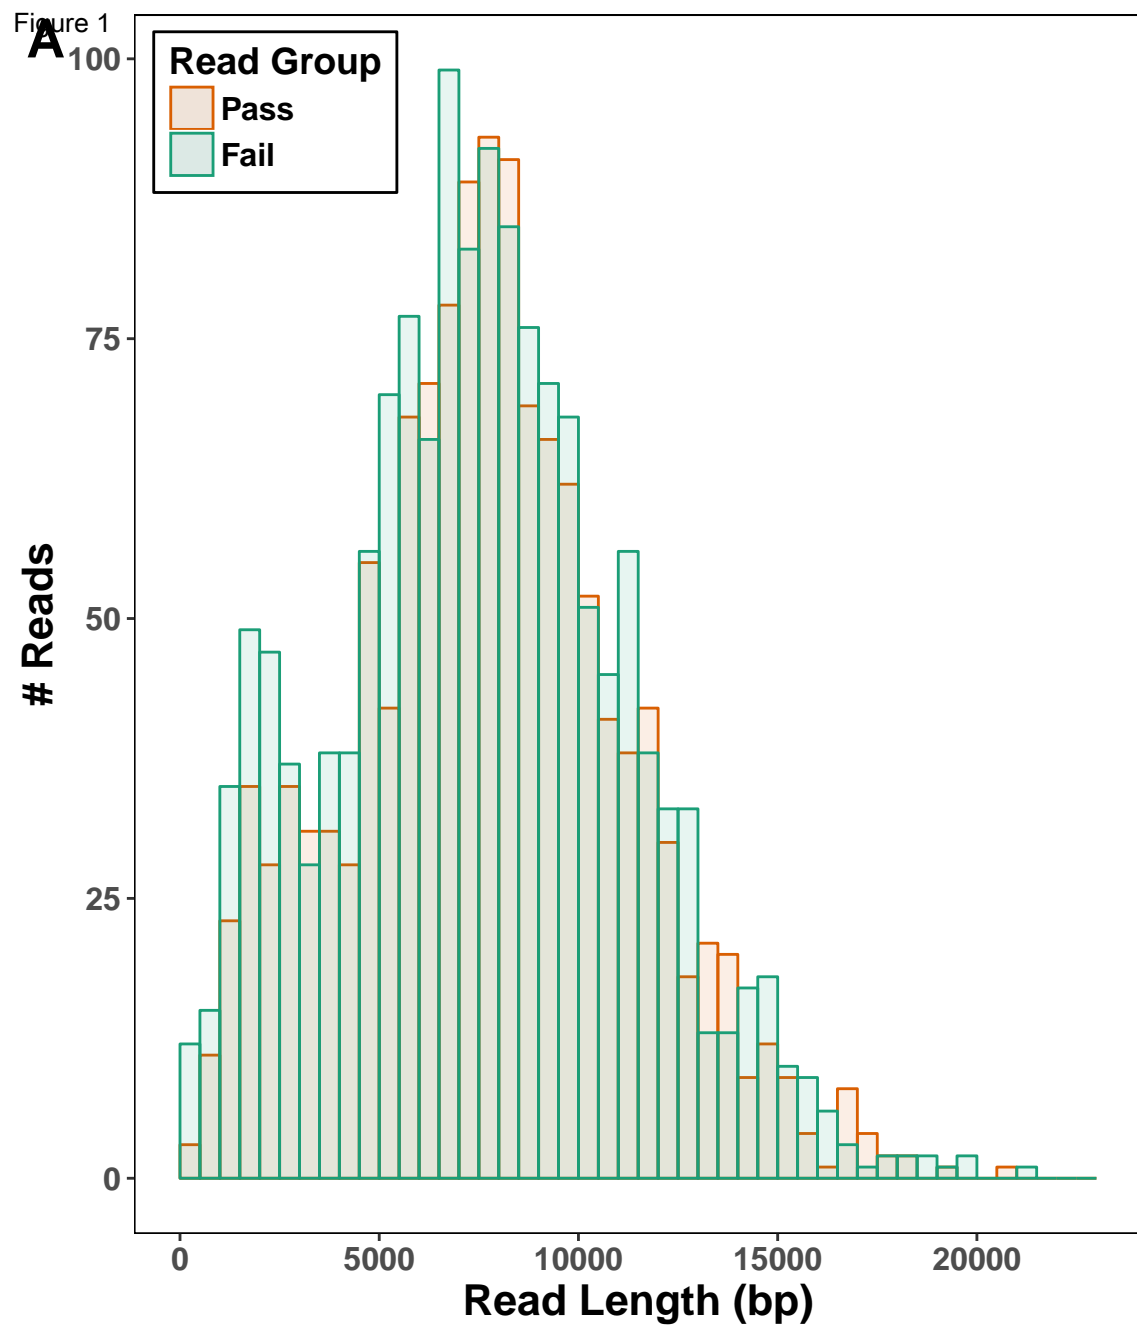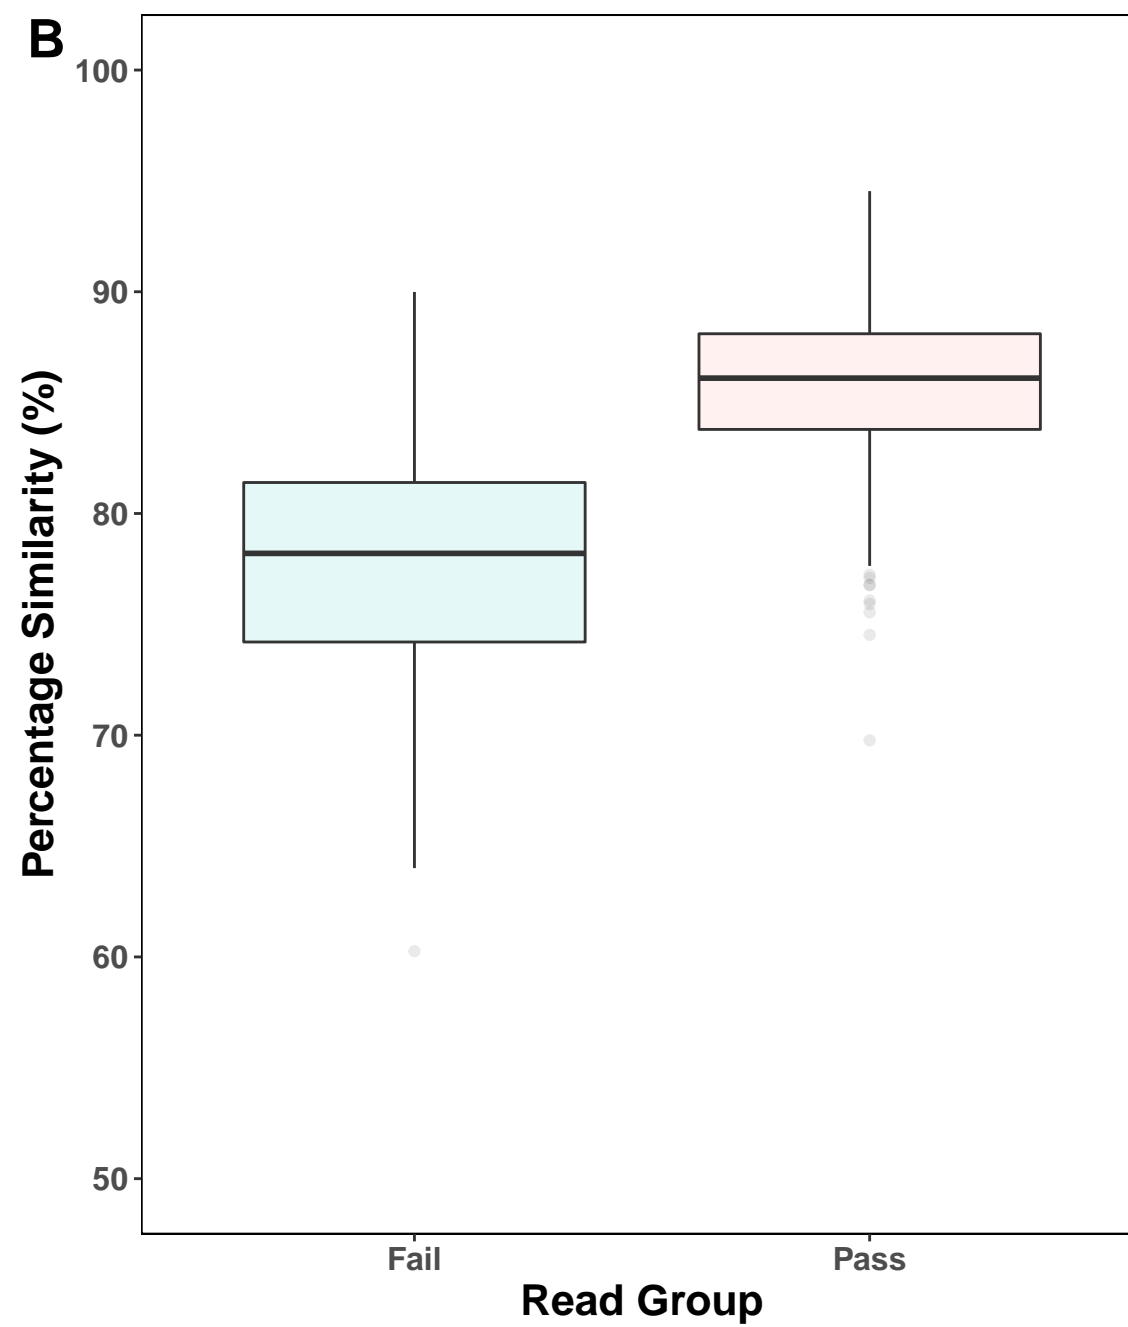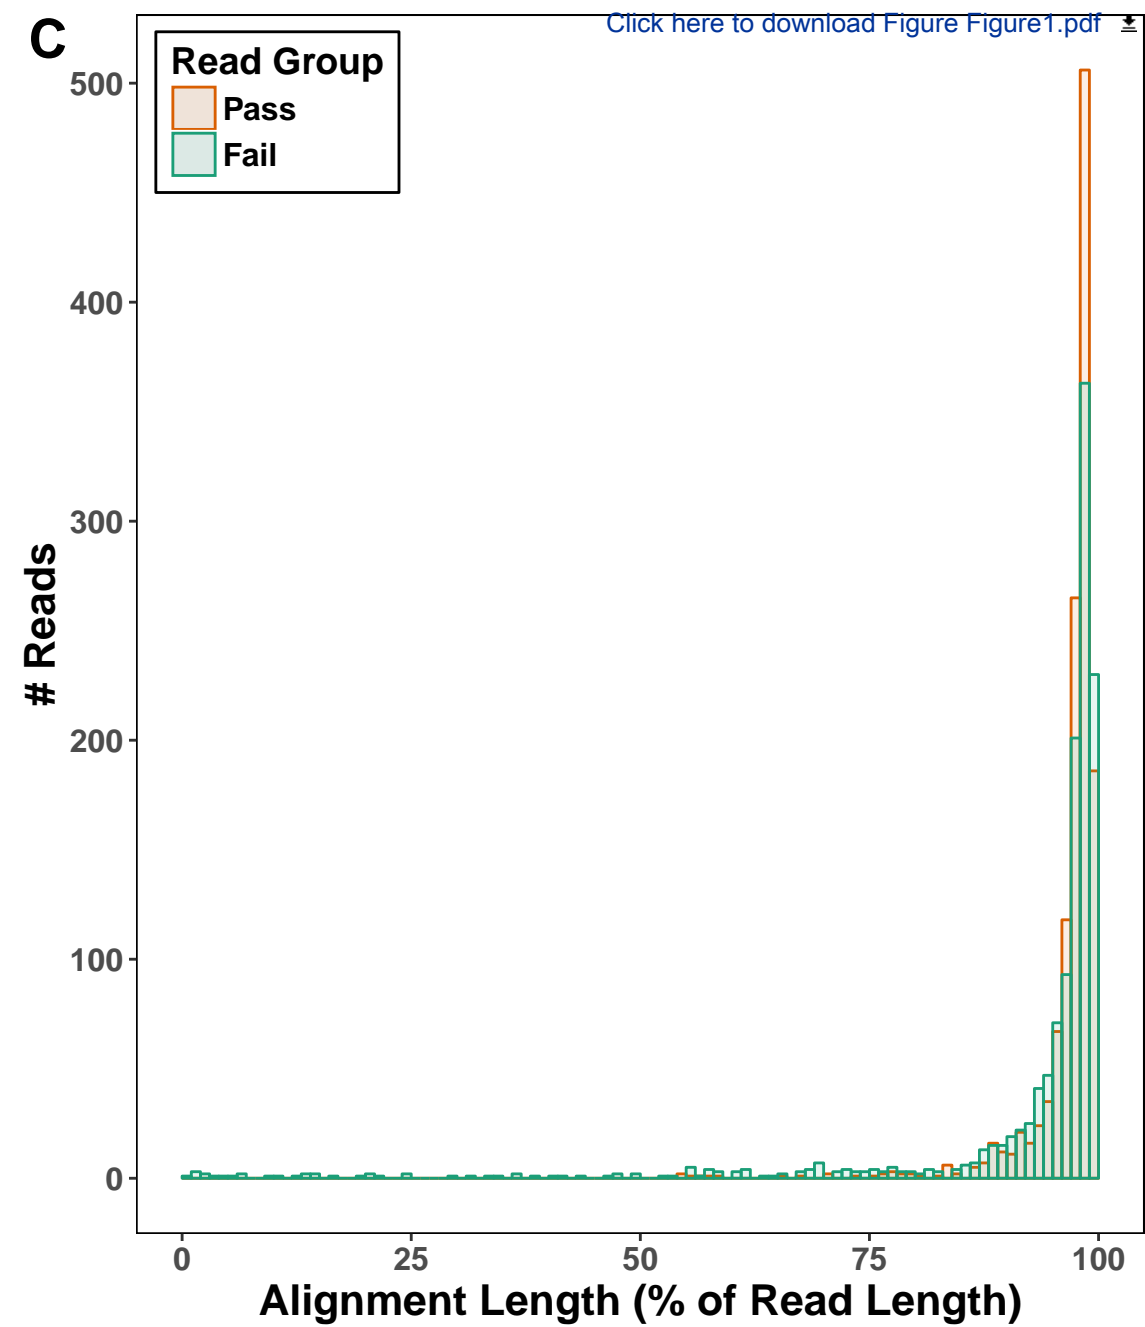

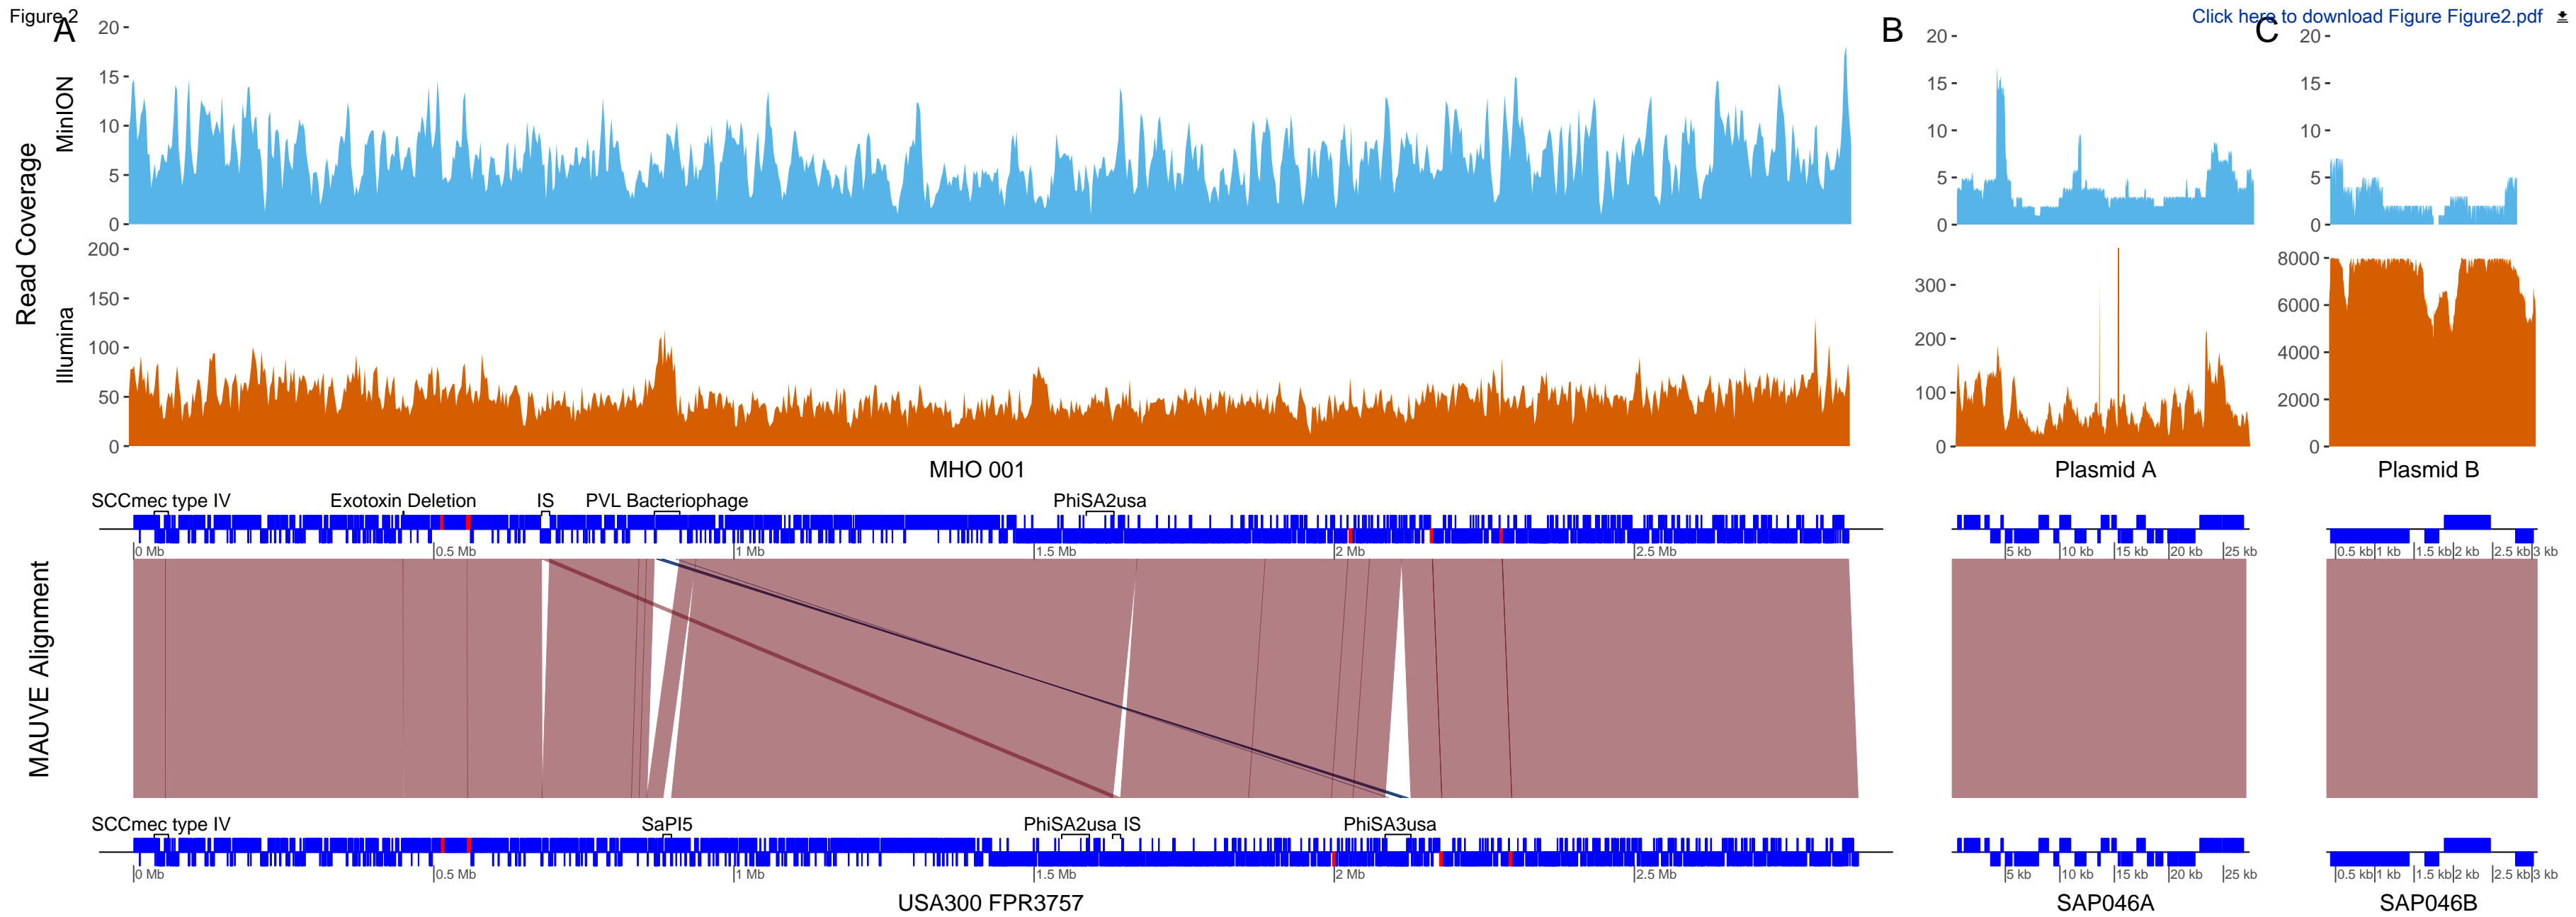





Click here to access/download  
**Supplementary Material**  
Supp\_Table1.pdf



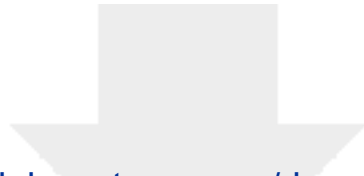

Click here to access/download  
**Supplementary Material**  
Supp\_Table2.xlsx

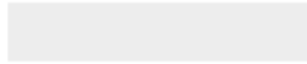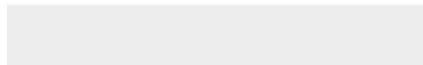



Click here to access/download  
**Supplementary Material**  
Supp\_Figure1.jpg



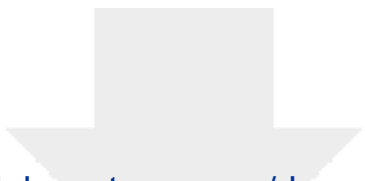

Click here to access/download  
**Supplementary Material**  
Supp\_Figure2.jpg





Click here to access/download  
**Supplementary Material**  
Supp\_Figure3.jpg





Click here to access/download  
**Supplementary Material**  
Supp\_Figure4.jpeg





Click here to access/download  
**Supplementary Material**  
Supplementary\_Analysis.pdf







Click here to access/download  
**Supplementary Material**  
DataDescription.docx





Click here to access/download  
**Supplementary Material**  
Response\_to\_Reviewers.pdf



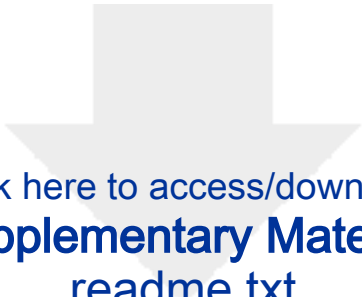

Click here to access/download  
**Supplementary Material**  
readme.txt



Supplement: gix001_giga-d-16-00028_reviewer_3.pdf [file gix001_giga-d-16-00028_reviewer_3.pdf]
